# Supplementary material for: Factorial design analysis of parameters for the sorption-enhanced steam reforming of ethanol in a circulating fluidized bed riser using CFD
Source: Royal Society of Chemistry journal article supplement (doi:10.1039/c8ra03901a), 2018-01-01
Supplement: c8ra03901a1.pdf [file c8ra03901a1.pdf]

### Electronic Supplementary Information (ESI)

#### Factorial Design Analysis of Parameters for Sorption Enhanced Steam Reforming of Ethanol in a Circulating Fluidized Bed Riser using CFD

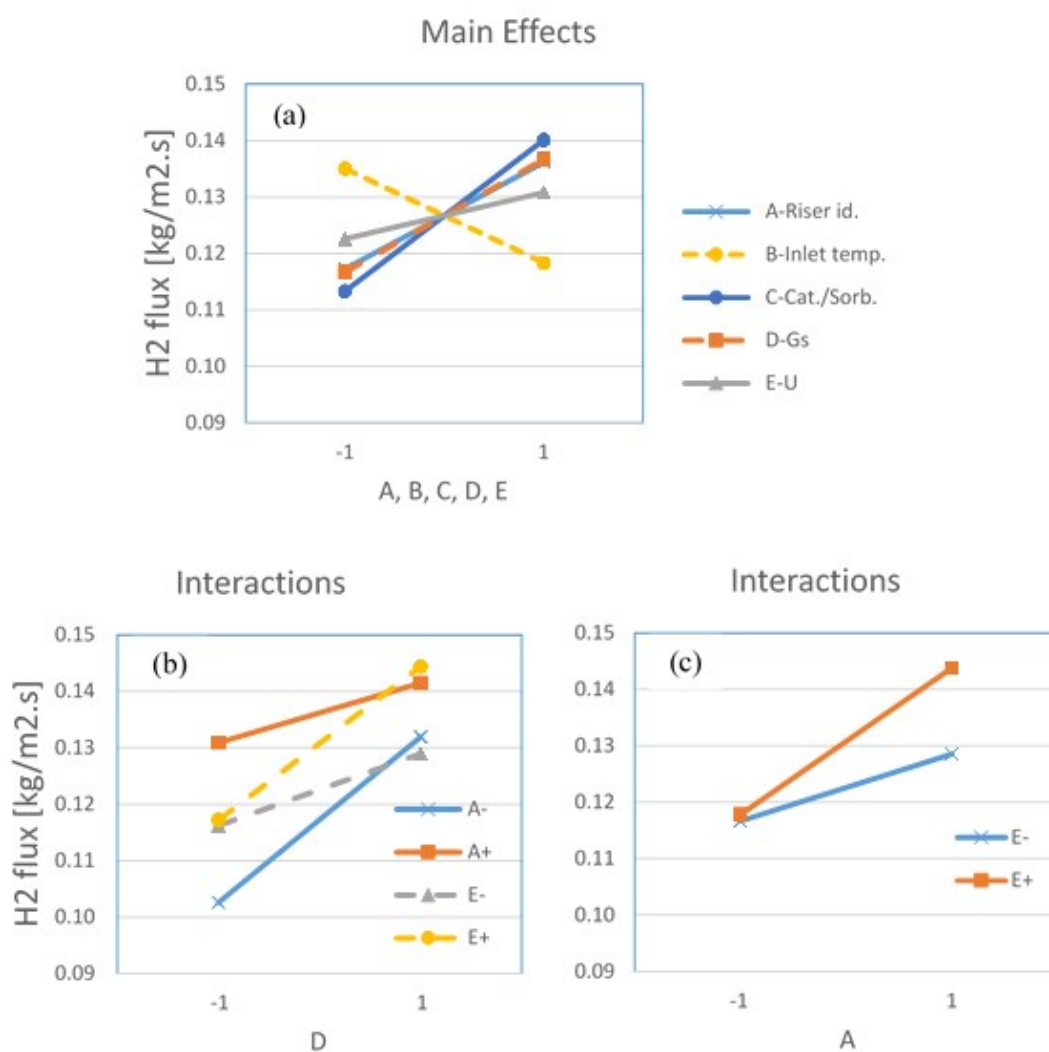

**Fig. S1.** The main effects (a) and the interactions (b and c) on the H<sub>2</sub> flux.

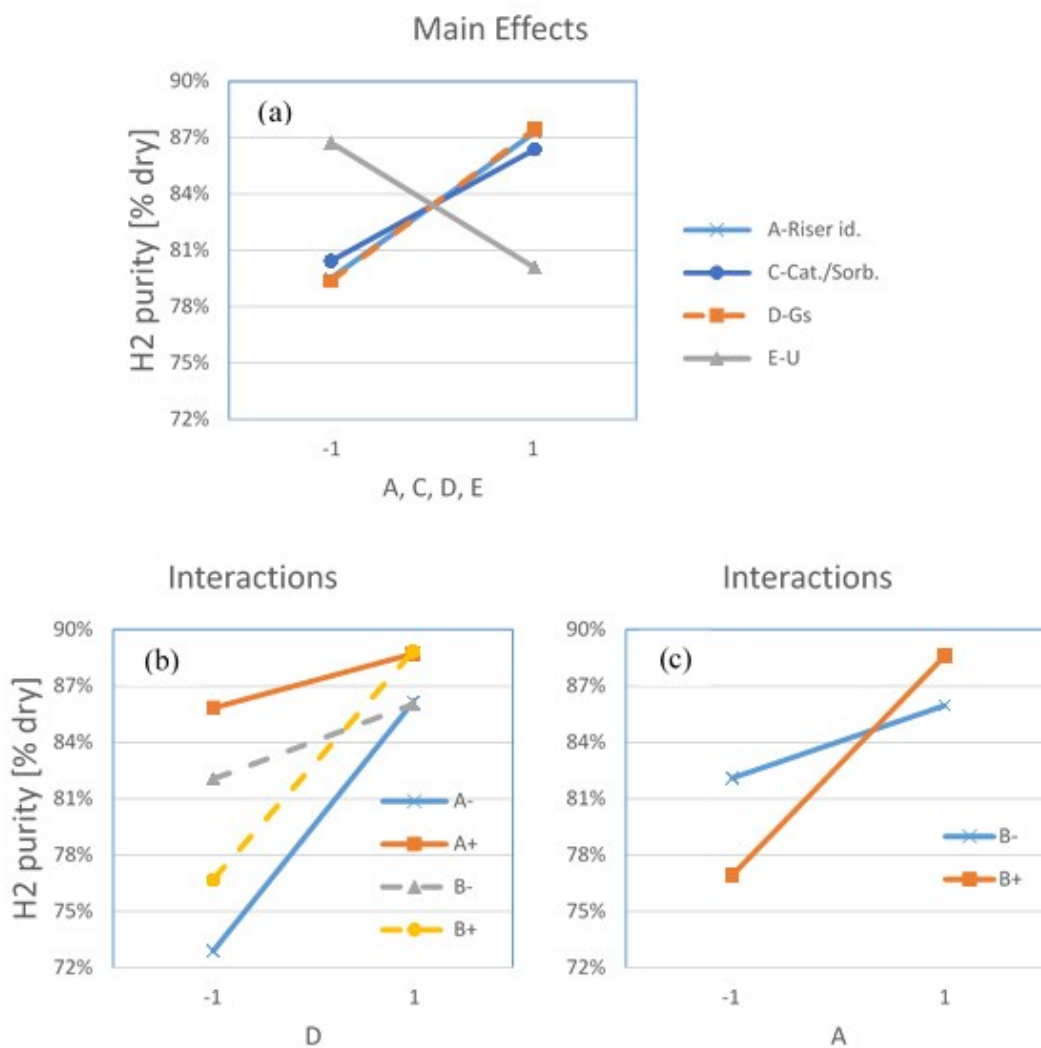

**Fig. S2.** The main effects (a) and the interactions (b and c) on the H<sub>2</sub> purity.

**Table S1** Conservation equations used in the simulations.

a) Mass conservation for each phase q:

$$\frac{\partial}{\partial t}(\varepsilon_q \rho_q) + \nabla \cdot (\varepsilon_q \rho_q \vec{v}_q) = \sum_{p=1}^n (\dot{m}_{pq} - \dot{m}_{qp}) + S_{m,q} \quad (S1)$$

b) Momentum conservation

- for gas phase:

$$\frac{\partial}{\partial t}(\varepsilon_g \rho_g \vec{v}_g) + \nabla \cdot (\varepsilon_g \rho_g \vec{v}_g \vec{v}_g) = -\varepsilon_g \nabla p + \nabla \cdot \bar{\tau}_g + \varepsilon_g \rho_g \vec{g} + \sum_{s=1}^n (K_{sg}(\vec{v}_s - \vec{v}_g) + \dot{m}_{sg} \vec{v}_{sg} - \dot{m}_{gs} \vec{v}_{gs}) \quad (S2)$$

- for solid phase:

$$\frac{\partial}{\partial t}(\varepsilon_s \rho_s \vec{v}_s) + \nabla \cdot (\varepsilon_s \rho_s \vec{v}_s \vec{v}_s) = -\varepsilon_s \nabla p - \nabla p_s + \nabla \cdot \bar{\tau}_s + \varepsilon_s \rho_s \vec{g} + \sum_{l=1}^n (K_{ls}(\vec{v}_l - \vec{v}_s) + \dot{m}_{ls} \vec{v}_{ls} - \dot{m}_{sl} \vec{v}_{sl}) \quad (S3)$$

c) Energy conservation

- for gas phase:

$$\frac{\partial}{\partial t}(\varepsilon_g \rho_g H_g) + \nabla \cdot (\varepsilon_g \rho_g \vec{v}_g H_g) = \varepsilon_g \frac{\partial p_g}{\partial t} + \bar{\tau}_g : \nabla \vec{v}_g - \nabla \cdot \vec{q}_g + S_{h,g} + \sum_{s=1}^n (Q_{sg} + \dot{m}_{sg} h_{sg} - \dot{m}_{gs} h_{gs}) \quad (S4)$$

- kinetic fluctuation energy conservation for solid phase:

$$\frac{3}{2} \left[ \frac{\partial}{\partial t}(\varepsilon_s \rho_s \Theta_s) + \nabla \cdot (\varepsilon_s \rho_s \vec{v}_s \Theta_s) \right] = (-p_s \bar{I} + \bar{\tau}_s) : \nabla \vec{v}_s + \nabla \cdot (k_{\Theta_s} \nabla \Theta_s) - \gamma_{\Theta_s} + \phi_{ls} \quad (S5)$$

where  $\gamma_{\Theta_s}$  is collisional dissipation of energy (Lun *et al.* [S1]):

$$\gamma_{\Theta_s} = \frac{12(1 - e_{ss}^2) g_{0,ss}}{d_s \sqrt{\pi}} \rho_s \varepsilon_s^2 \Theta_s^{3/2} \quad (S6)$$

and  $\phi_{ls}$  is kinetic energy exchange between phase l and solid phase:

$$\phi_{ls} = -3K_{ls} \Theta_s \quad (S7)$$

d) Chemical species conservation of the species k in phase q:

$$\frac{\partial}{\partial t}(\varepsilon^q \rho^q Y_k^q) + \nabla \cdot (\varepsilon^q \rho^q \vec{v}^q Y_k^q) = -\nabla \cdot (\varepsilon^q \vec{J}_k^q) + \varepsilon^q R_k^q + \varepsilon^q S_k^q + \sum_{p=1}^n (\dot{m}_{p,q}^k - \dot{m}_{q,p}^k) \quad (S8)$$

**Table S2** Constitutive equations used in the simulations.

a) Stress tensor for each phase q:

$$\bar{\tau}_q = \varepsilon_q \mu_q (\nabla \bar{v}_q + \nabla \bar{v}_q^T) + \varepsilon_q \left( \lambda_q - \frac{2}{3} \mu_q \right) \nabla \cdot \bar{v}_q \bar{I} \quad (\text{S9})$$

b) Solid shear viscosity:

$$\mu_s = \mu_{s,\text{col}} + \mu_{s,\text{kin}} + \mu_{s,\text{fr}} \quad (\text{S10})$$

where  $\mu_{s,\text{col}}$  is the collisional viscosity:

$$\mu_{s,\text{col}} = \frac{4}{5} \varepsilon_s \rho_s d_s g_{0,ss} (1 + e_{ss}) \left( \frac{\Theta_s}{\pi} \right)^{1/2} \varepsilon_s \quad (\text{S11})$$

and  $\mu_{s,\text{kin}}$  is the kinetic viscosity (Gidaspow *et al.* [S1]):

$$\mu_{s,\text{kin}} = \frac{10 \rho_s d_s \sqrt{\Theta_s \pi}}{96 \varepsilon_s (1 + e_{ss}) g_{0,ss}} \left[ 1 + \frac{4}{5} \varepsilon_s g_{0,ss} (1 + e_{ss}) \right]^2 \varepsilon_s \quad (\text{S12})$$

c) Solid bulk viscosity (Lun *et al.* [S1]):

$$\lambda_s = \frac{4}{3} \varepsilon_s^2 \rho_s d_s g_{0,ss} (1 + e_{ss}) \left( \frac{\Theta_s}{\pi} \right)^{1/2} \quad (\text{S13})$$

d) Solid Pressure (Lun *et al.* [S1]):

$$p_s = \varepsilon_s \rho_s \Theta_s + 2 \varepsilon_s^2 \rho_s \Theta_s g_{0,ss} (1 + e_{ss}) \quad (\text{S14})$$

e) Radial distribution coefficient

- for one solid phase (Lun *et al.* [S1]):

$$g_{0,ss} = \left[ 1 - \left( \frac{\varepsilon_s}{\varepsilon_{s,\text{max}}} \right)^{1/3} \right]^{-1} \quad (\text{S15})$$

- the mutual radial distribution coefficient between two solid phases:

$$g_{0,ls} = \frac{d_s g_{0,ll} + d_l g_{0,ss}}{d_s + d_l} \quad (\text{S16})$$

f) Granular temperature from KTGF:

$$\frac{3\partial}{2\partial t}(\varepsilon_s \rho_s \Theta_s) = (-p_s \bar{I} + \bar{\tau}_s) : \nabla \vec{v}_s - \gamma_{\Theta_s} + \phi_{ls} \quad (\text{S17})$$

g) Gas-solid momentum exchange coefficient using Gidaspow's drag model [S1]

- for  $\varepsilon_g > 0.8$ :

$$K_{sg} = \frac{3}{4} C_D \frac{\varepsilon_s \varepsilon_g \rho_g |\vec{v}_s - \vec{v}_g|}{d_s} \varepsilon_g - 2.65 \quad (\text{S18})$$

where  $C_D$  is drag coefficient:

$$C_D = \frac{24}{\varepsilon_g \text{Re}_s} \left[ 1 + 0.15 (\varepsilon_g \text{Re}_s)^{0.687} \right] \quad (\text{S19})$$

- for  $\varepsilon_g \leq 0.8$ :

$$K_{sg} = 150 \frac{\varepsilon_s (1 - \varepsilon_g) \mu_g}{\varepsilon_g d_s^2} + 1.75 \frac{\rho_g \varepsilon_s |\vec{v}_s - \vec{v}_g|}{d_s} \quad (\text{S20})$$

h) Solid-solid momentum exchange coefficient:

$$K_{ls} \equiv K_{sl} = \frac{3(1 + e_{ls}) \left( \frac{\pi}{2} + C_{fr,ls} \frac{\pi^2}{8} \right) \varepsilon_s \rho_s \varepsilon_l \rho_l (d_l + d_s)^2 g_{0,ls}}{2\pi(\rho_l d_l^3 + \rho_s d_s^3)} |\vec{v}_l - \vec{v}_s| \quad (\text{S21})$$

i) Gas-solid heat exchange coefficient:

$$h_{sg} \equiv h_{gs} = \frac{k_g \text{Nu}_s}{d_s} \quad (\text{S22})$$

where  $\text{Nu}_s$  is Nusselt number of solid phase (Gunn's model [S1]):

$$\text{Nu}_s = (7 - 10\varepsilon_g + 5\varepsilon_g^2) (1 + 0.7 \text{Re}_s^{0.2} \text{Pr}^{1/3}) + (1.33 - 2.4\varepsilon_g + 1.2\varepsilon_g^2) \text{Re}_s^{0.7} \text{Pr}^{1/3} \quad (\text{S23})$$

**Table S3** The setting of phase and system properties in the simulations.

Phase properties

|                                                |       |
|------------------------------------------------|-------|
| Catalyst density [kg/m <sup>3</sup> ]          | 2,200 |
| Calcined dolomite density [kg/m <sup>3</sup> ] | 1,540 |

|                                                                        |                 |
|------------------------------------------------------------------------|-----------------|
| Mean catalyst particle size [ $\mu\text{m}$ ]                          | 200             |
| Mean dolomite particle size [ $\mu\text{m}$ ]                          | 250             |
| MgO content in dolomite [wt %]                                         | 40              |
| Inlet granular temperature of solid phases [ $\text{m}^2/\text{s}^2$ ] | $1 \times 10^5$ |
| Packing limit of solid phases                                          | 0.60            |
| Restitution coefficient of all phase interactions                      | 0.90            |
| <u>System properties</u>                                               |                 |
| Outlet pressure [atm]                                                  | 1               |
| Wall type                                                              | Adiabatic       |
| Shear condition                                                        | No slip         |

**Table S4** The fixed parameters and the studied parameters of the  $2^5$  full factorial design.

| Parameters                                               | Low level | High level |
|----------------------------------------------------------|-----------|------------|
| <u>Design parameters</u>                                 |           |            |
| Gas inlet velocity: $U$ [m/s]                            | 3         | 4          |
| Solid flux: $G_s$ [ $\text{kg}/\text{m}^2\text{s}$ ]     | 100       | 200        |
| Diameter of the riser: $i_d$ [m]                         | 0.1       | 0.2        |
| Height of the riser: $H$ [m]                             | 7 (fixed) |            |
| <u>Reaction parameters</u>                               |           |            |
| Catalyst to sorbent ratio: Cat/Sb [kg/kg]                | 0.58      | 2.54       |
| Steam/Ethanol molar ratio: S/E [mol/mol]                 | 6 (fixed) |            |
| Temperature of inlets: $T_{in}$ [ $^{\circ}\text{C}$ ]   | 600       | 700        |
| CaO conversion of inlet sorbent: $X_{\text{CaO},in}$ [%] | 0 (fixed) |            |

**Table S5** The area-averaged H<sub>2</sub> flux, H<sub>2</sub> purity and CaO conversion (X<sub>CaO</sub>) near the outlet of the riser from parametric study with the 2<sup>5</sup> factorial design.

| Factor: | A   | B               | C       | D                     | E     | R1                    | R2                    |                  |
|---------|-----|-----------------|---------|-----------------------|-------|-----------------------|-----------------------|------------------|
| Run     | id  | T <sub>in</sub> | Cat/Sb  | G <sub>s</sub>        | U     | H <sub>2</sub> flux   | H <sub>2</sub> purity | X <sub>CaO</sub> |
|         | [m] | [°C]            | [kg/kg] | [kg/m <sup>2</sup> s] | [m/s] | [kg/m <sup>2</sup> s] | [% dry]               | [%]              |
| 1       | 0.1 | 600             | 2.54    | 100                   | 3     | 0.132795              | 85.96                 | 2.54             |
| 2       | 0.1 | 600             | 2.54    | 100                   | 4     | 0.134116              | 78.85                 | 2.36             |
| 3       | 0.1 | 600             | 2.54    | 200                   | 3     | 0.142458              | 89.01                 | 1.47             |
| 4       | 0.1 | 600             | 2.54    | 200                   | 4     | 0.163118              | 85.17                 | 1.53             |
| 5       | 0.1 | 600             | 0.58    | 100                   | 3     | 0.107676              | 80.88                 | 0.84             |
| 6       | 0.1 | 600             | 0.58    | 100                   | 4     | 0.095864              | 72.13                 | 0.71             |
| 7       | 0.1 | 600             | 0.58    | 200                   | 3     | 0.118917              | 84.78                 | 0.51             |
| 8       | 0.1 | 600             | 0.58    | 200                   | 4     | 0.124579              | 80.10                 | 0.50             |
| 9       | 0.1 | 700             | 2.54    | 100                   | 3     | 0.122248              | 89.53                 | 2.84             |
| 10      | 0.1 | 700             | 2.54    | 100                   | 4     | 0.088973              | 59.58                 | 0.08             |
| 11      | 0.1 | 700             | 2.54    | 200                   | 3     | 0.129442              | 91.93                 | 1.70             |
| 12      | 0.1 | 700             | 2.54    | 200                   | 4     | 0.150081              | 87.67                 | 1.88             |
| 13      | 0.1 | 700             | 0.58    | 100                   | 3     | 0.069700              | 59.82                 | 0.02             |
| 14      | 0.1 | 700             | 0.58    | 100                   | 4     | 0.069147              | 56.47                 | 0.02             |
| 15      | 0.1 | 700             | 0.58    | 200                   | 3     | 0.110062              | 87.66                 | 0.62             |
| 16      | 0.1 | 700             | 0.58    | 200                   | 4     | 0.116549              | 82.74                 | 0.55             |
| 17      | 0.2 | 600             | 2.54    | 100                   | 3     | 0.138739              | 88.94                 | 1.54             |
| 18      | 0.2 | 600             | 2.54    | 100                   | 4     | 0.162809              | 85.04                 | 1.64             |
| 19      | 0.2 | 600             | 2.54    | 200                   | 3     | 0.146765              | 91.30                 | 0.84             |
| 20      | 0.2 | 600             | 2.54    | 200                   | 4     | 0.173570              | 87.57                 | 0.96             |
| 21      | 0.2 | 600             | 0.58    | 100                   | 3     | 0.119885              | 84.64                 | 0.52             |
| 22      | 0.2 | 600             | 0.58    | 100                   | 4     | 0.128142              | 79.93                 | 0.53             |
| 23      | 0.2 | 600             | 0.58    | 200                   | 3     | 0.128984              | 87.32                 | 0.30             |
| 24      | 0.2 | 600             | 0.58    | 200                   | 4     | 0.142326              | 82.94                 | 0.32             |
| 25      | 0.2 | 700             | 2.54    | 100                   | 3     | 0.126764              | 91.89                 | 1.68             |
| 26      | 0.2 | 700             | 2.54    | 100                   | 4     | 0.143514              | 86.29                 | 1.82             |

|    |     |     |      |     |   |          |       |      |
|----|-----|-----|------|-----|---|----------|-------|------|
| 27 | 0.2 | 700 | 2.54 | 200 | 3 | 0.133745 | 94.07 | 0.95 |
| 28 | 0.2 | 700 | 2.54 | 200 | 4 | 0.152288 | 89.07 | 1.07 |
| 29 | 0.2 | 700 | 0.58 | 100 | 3 | 0.112057 | 88.65 | 0.63 |
| 30 | 0.2 | 700 | 0.58 | 100 | 4 | 0.115007 | 81.31 | 0.60 |
| 31 | 0.2 | 700 | 0.58 | 200 | 3 | 0.121366 | 91.26 | 0.38 |
| 32 | 0.2 | 700 | 0.58 | 200 | 4 | 0.132704 | 86.25 | 0.41 |

**Table S6** The results of the ANOVA of the H<sub>2</sub> flux.

| Source               | Sum of squares | Degree of freedom (DF) | Mean square | F-value  | P-value  |
|----------------------|----------------|------------------------|-------------|----------|----------|
| C (Cat/Sb)           | 0.005737       | 1                      | 0.005737    | 79.93976 | <0.0001  |
| D (G <sub>s</sub> )  | 0.003190       | 1                      | 0.003190    | 44.4568  | <0.0001  |
| A (id)               | 0.002868       | 1                      | 0.002868    | 39.96242 | <0.0001  |
| B (T <sub>in</sub> ) | 0.002229       | 1                      | 0.002229    | 31.06468 | <0.0001  |
| AD                   | 0.000702       | 1                      | 0.000702    | 9.77882  | 0.004733 |
| E (U)                | 0.000538       | 1                      | 0.000538    | 7.493613 | 0.011736 |
| DE                   | 0.000419       | 1                      | 0.000419    | 5.836395 | 0.024042 |
| AE                   | 0.000399       | 1                      | 0.000399    | 5.552999 | 0.027341 |
| Residual             | 0.001651       | 23                     | 7.18E-05    |          |          |
| Cor Total            | 0.017732       | 31                     |             |          |          |

**Table S7** The results of the ANOVA of the H<sub>2</sub> purity.



| Source              | Sum of squares | Degree of freedom (DF) | Mean square | F-value  | P-value  |
|---------------------|----------------|------------------------|-------------|----------|----------|
| D (G <sub>s</sub> ) | 519.2369       | 1                      | 519.2369    | 26.61521 | <0.0001  |
| A (id)              | 481.9729       | 1                      | 481.9729    | 24.70513 | <0.0001  |
| E (U)               | 354.6858       | 1                      | 354.6858    | 18.1806  | 0.000292 |
| C (Cat/Sb)          | 281.9324       | 1                      | 281.9324    | 14.45138 | 0.00092  |
| AD                  | 213.7666       | 1                      | 213.7666    | 10.95732 | 0.003054 |
| BD                  | 133.1668       | 1                      | 133.1668    | 6.825905 | 0.015563 |
| AB                  | 122.3844       | 1                      | 122.3844    | 6.273218 | 0.01979  |
| ABD                 | 117.8375       | 1                      | 117.8375    | 6.040152 | 0.021944 |
| Residual            | 448.7076       | 23                     | 19.50902    |          |          |
| Cor Total           | 2673.691       | 31                     |             |          |          |

### References

[S1] ANSYS Inc., ANSYS Fluent Theory Guide 15.0, SAS IP Inc., USA, 2013.
